# Supplementary material for: Assessment of manufacturing processes and materials characterization on a collection of ancient Chinese Jades
Source: Research Square preprint supplement (doi:10.21203/rs.3.rs-7472554/v1), 2025-09-09
Supplement: Supplementary file 1 [file d267d24d95a03cb79d710b23.pdf]

## Assessment of manufacturing processes and materials characterization in a collection of ancient Chinese Jades

Roberto Giustetto<sup>1,2,3\*</sup>, Giulia Berruto<sup>1</sup>, Nadia Curetti<sup>1</sup>, Davide Bernasconi<sup>1</sup>, Giorgia Straface<sup>4</sup>, Giusi Sorrentino<sup>4,5</sup>, Laura Guidorzi<sup>4</sup>, Alessandro Lo Giudice<sup>3,4</sup>, Tommaso Poli<sup>6</sup>, Gabriele Vellano<sup>6</sup>, Benedetta Vitale<sup>6</sup>, Eliano Diana<sup>6</sup>.

<sup>1</sup>Department of Earth Sciences, University of Turin, via Valperga Caluso 35, Torino (Italy)

<sup>2</sup>NIS (Nanomaterials for Industry and Sustainability) Centre, via Quarello 11, Torino (Italy)

<sup>3</sup>INFN (National Institute of Nuclear Physics), via P. Giuria 5, Torino (Italy)

<sup>4</sup>Department of Physics, University of Turin, via P. Giuria 1, Torino (Italy)

<sup>5</sup>Department of Environmental Sciences, Informatics and Statistics, Ca' Foscari University of Venice, Via Torino 155, 30172 Mestre, Venezia (Italy)

<sup>6</sup>Department of Chemistry, University of Turin, via P. Giuria 7, 10125 Torino (Italy)

\*Corresponding author: [roberto.giustetto@unito.it](mailto:roberto.giustetto@unito.it)

### *Supplementary Material*

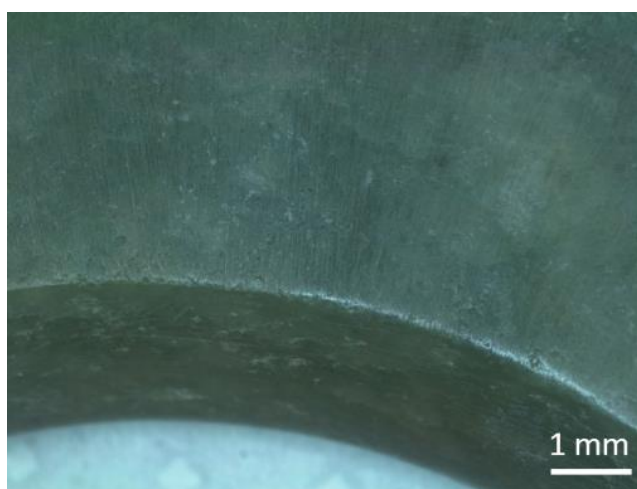

**Figure S1.** Micrograph of the Cp/9 bi ring surface, showing fine finishing traces smoothing the ring border in limited areas. Circular striations are also visible on the inner side of the hole.

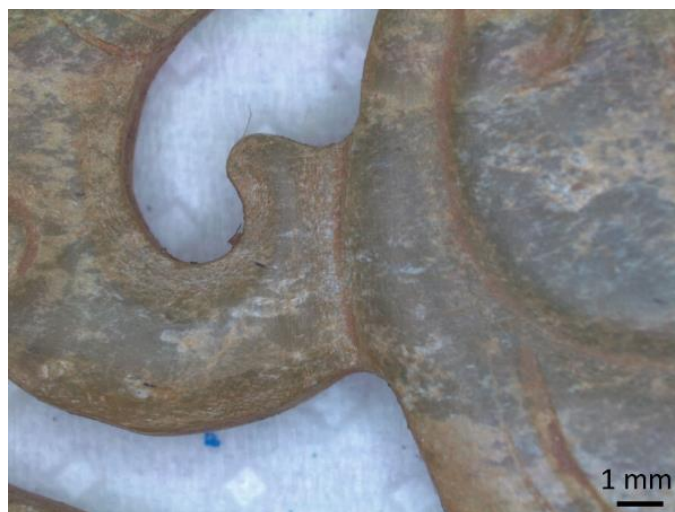

**Figure S2.** Micrograph of the openwork decoration and handcrafting marks on the Cp/16 dragon/feline plaque.

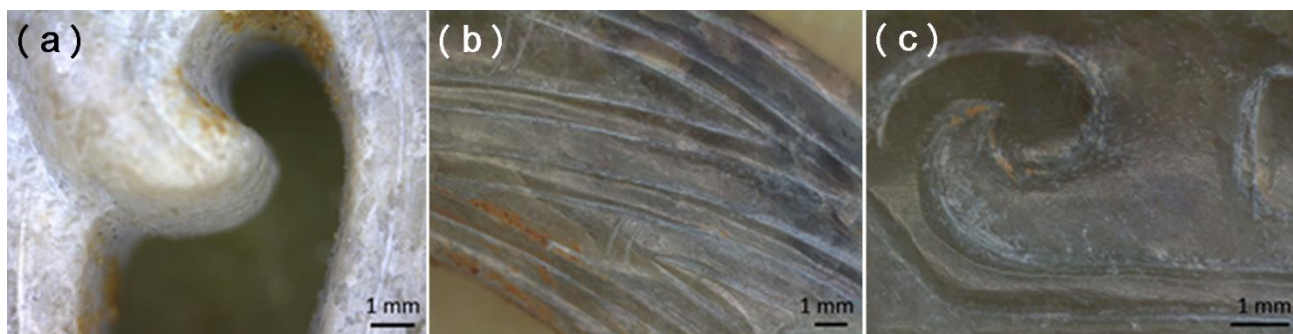

**Figure S3.** Micrographs of the Cp/18 spiral-shaped ornament: a) detail of the inner side of an openwork decoration, with striations (barely visible) parallel to the edge; b) and c) irregularities in the pattern of carved decorations.

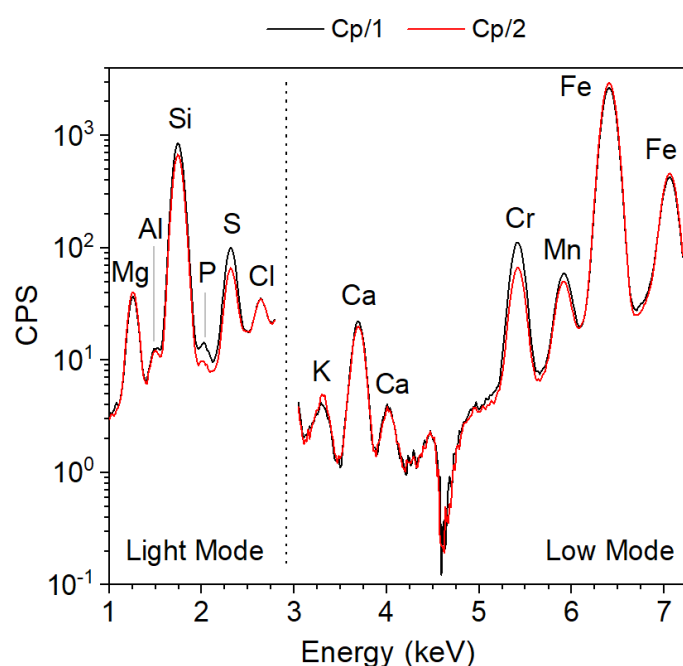

**Figure S4.** Average XRF spectra in light and low mode of sample CP/1 and CP/2. Peaks without labels are instrumental. Due to the type of measurement, the peaks between light and low modes cannot be compared in absolute height.

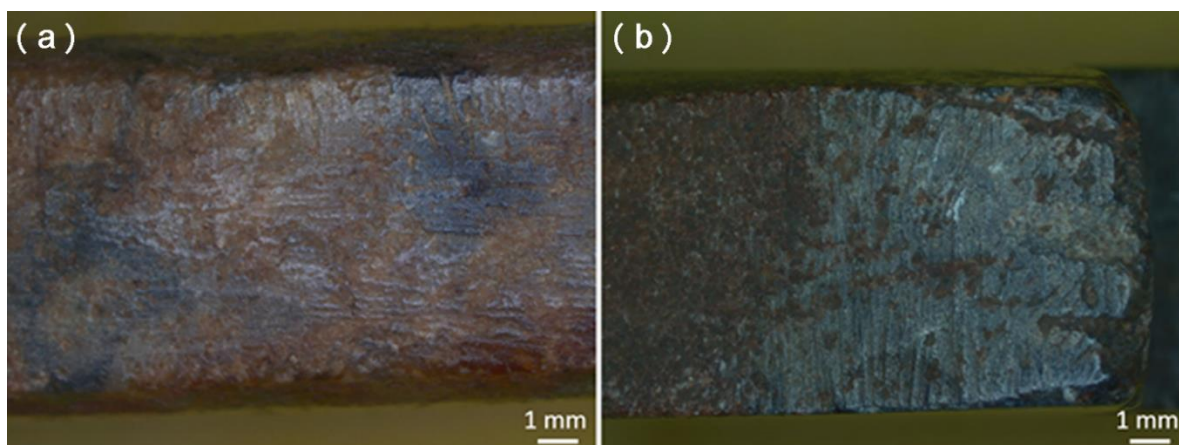

**Figure S5.** Cp/1 and Cp/2 zhang axe-heads: a) and b) micrographs of the lateral sides, where clear crafting marks and rounded edges are visible.

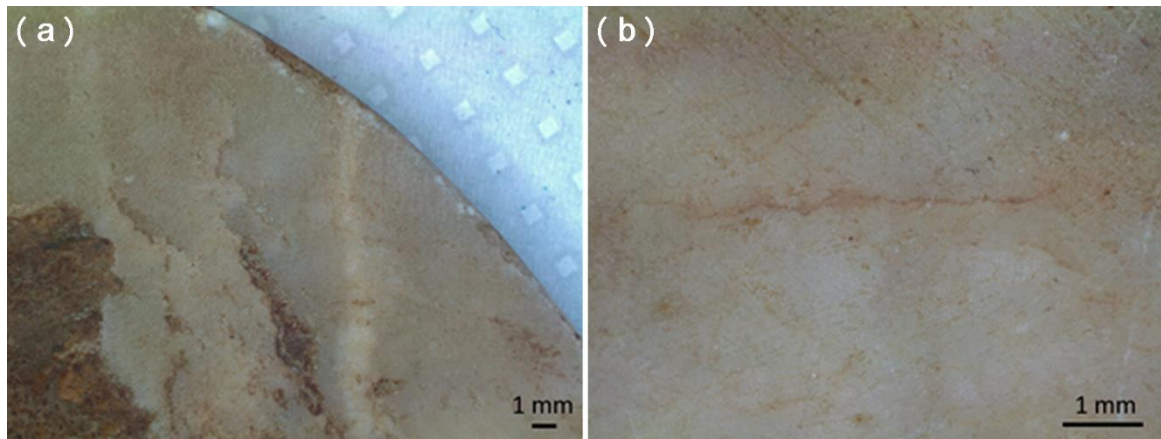

**Figure S6.** *Cp/7 bi ring: a) chipping along the edge, possibly due to post-depositional processes; b) Detail of the artefact surface, where groups of striations with different orientations are visible.*
